# Supplementary material for: A single biochemical activity underlies the pleiotropy of the aging-related protein CLK-1
Source: PubMed Central journal article supplement (PMC5429816; doi:10.1038/s41598-017-00754-z), 2017-04-12
Supplement: 41598_2017_754_MOESM1_ESM.pdf [file 41598_2017_754_MOESM1_ESM.pdf]

# **A single biochemical activity underlies the pleiotropy of the aging-related protein CLK-1**

Ju-Ling Liu, Callista Yee, Ying Wang, and Siegfried Hekimi

**Legend**

*clk-1(qm30)* mutants do not synthesize UQ<sub>9</sub> but instead accumulate DMQ<sub>9</sub>, a biosynthetic precursor of UQ<sub>9</sub>. The expression of CLK-1::GFP, but not CLK-1(ΔMTS)::GFP rescues the production of UQ<sub>9</sub> in *clk-1(qm30)* mutants.

Wildtype (N2)

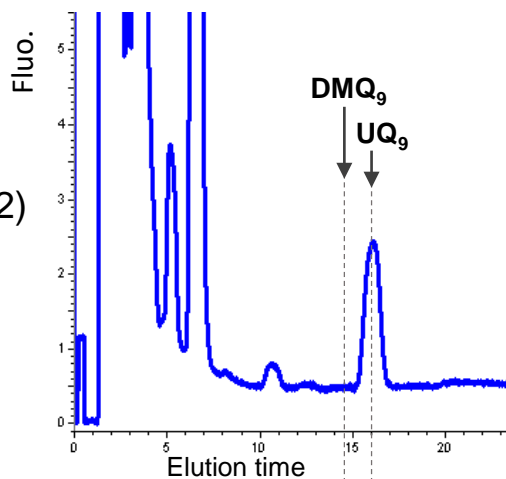*clk-1(qm30)*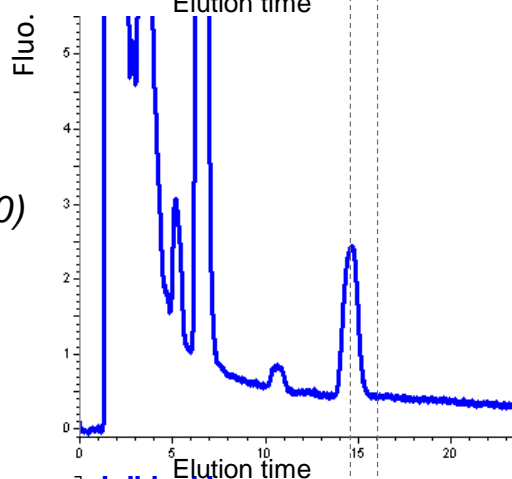*clk-1(qm30); pclk-1::clk-1::gfp*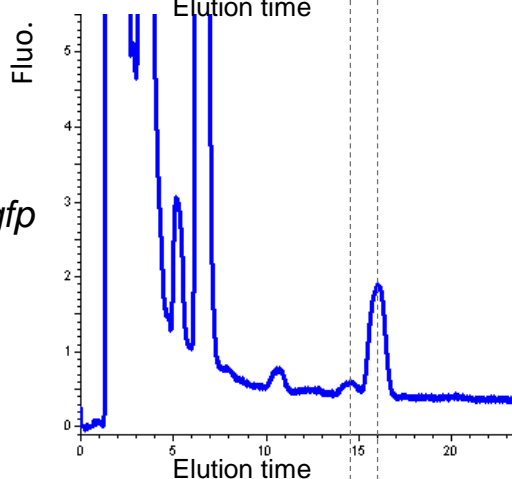*clk-1(qm30); pclk-1::clk-1ΔMTS::gfp*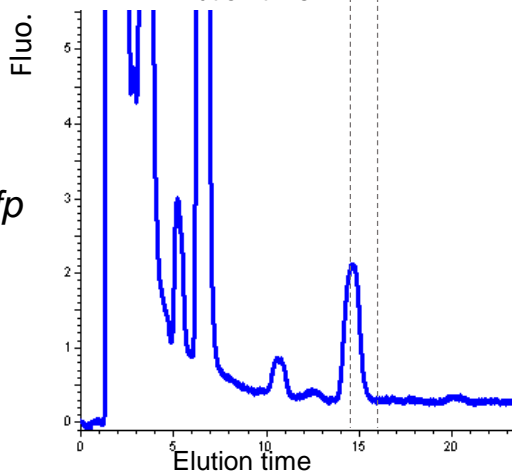

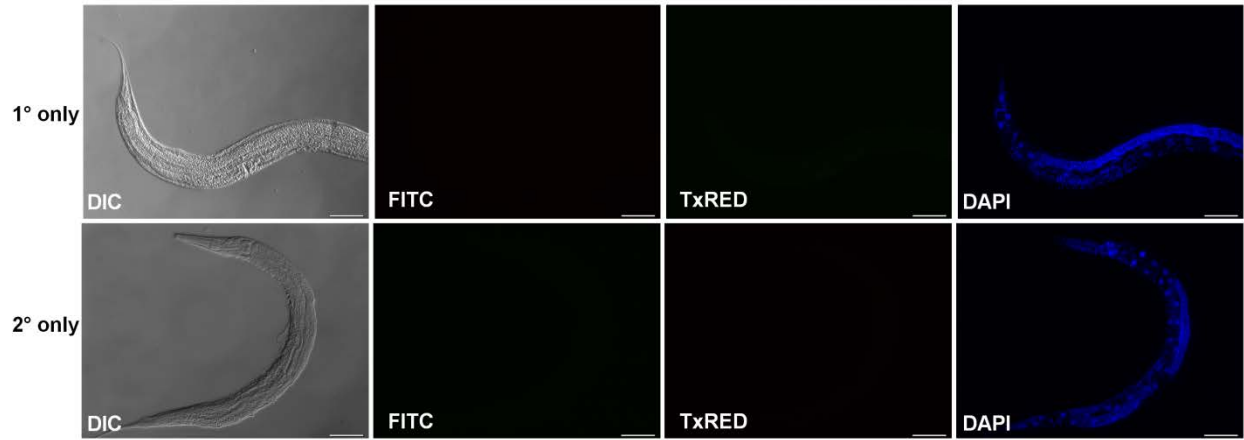

**Figure S2** Control staining lacking primary or secondary antibodies. Worms of all stages expressing CLK-1::GFP were freeze-cracked, fixed and stained in solutions lacking either primary or secondary antibody. Slides were mounted with DAPI and observed at 100x. Scale bar in all images is 50  $\mu$ m.

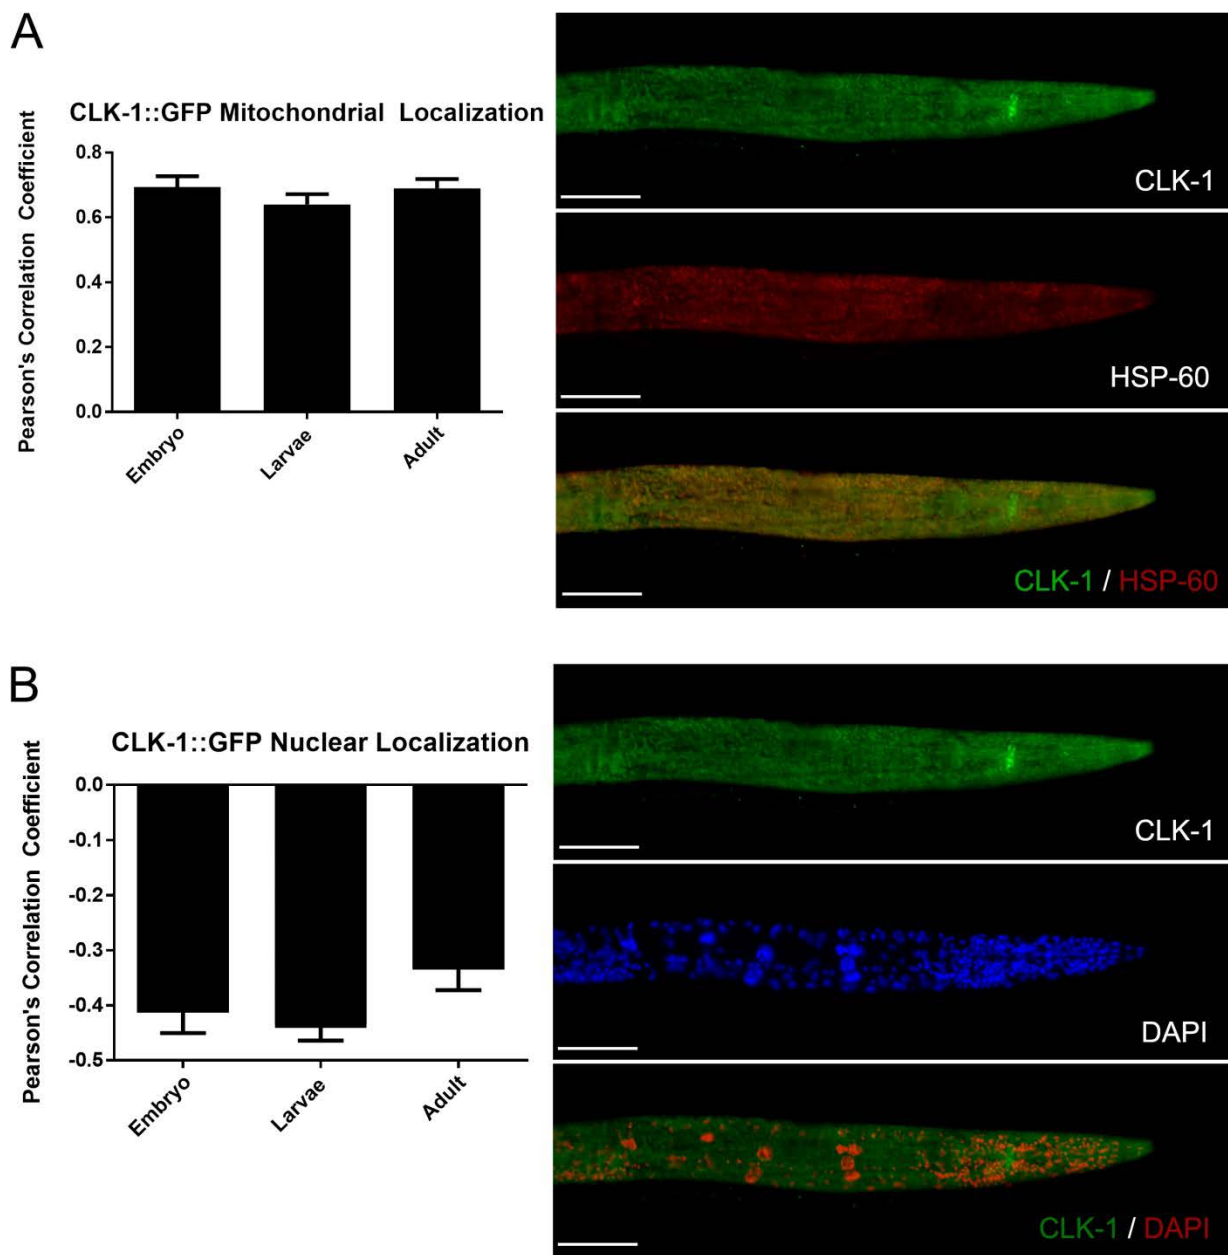

**Legend** Worms of all stages were freeze-cracked, fixed and stained using antibodies against GFP and HSP-60. A) Left: Quantification of Pearson's Correlation Coefficient between CLK-1::GFP and HSP-60. Values shown are Mean + SEM. Right: Double staining of CLK-1 (FITC filter) and HSP-60 (TxRED filter). B) Left: Quantification of Pearson's Correlation Coefficient between CLK-1::GFP and DAPI. Values shown are Mean + SEM. Right: Double staining of CLK-1 (FITC filter) and DAPI (DAPI filter). Scale bar in all images is 50  $\mu$ m.

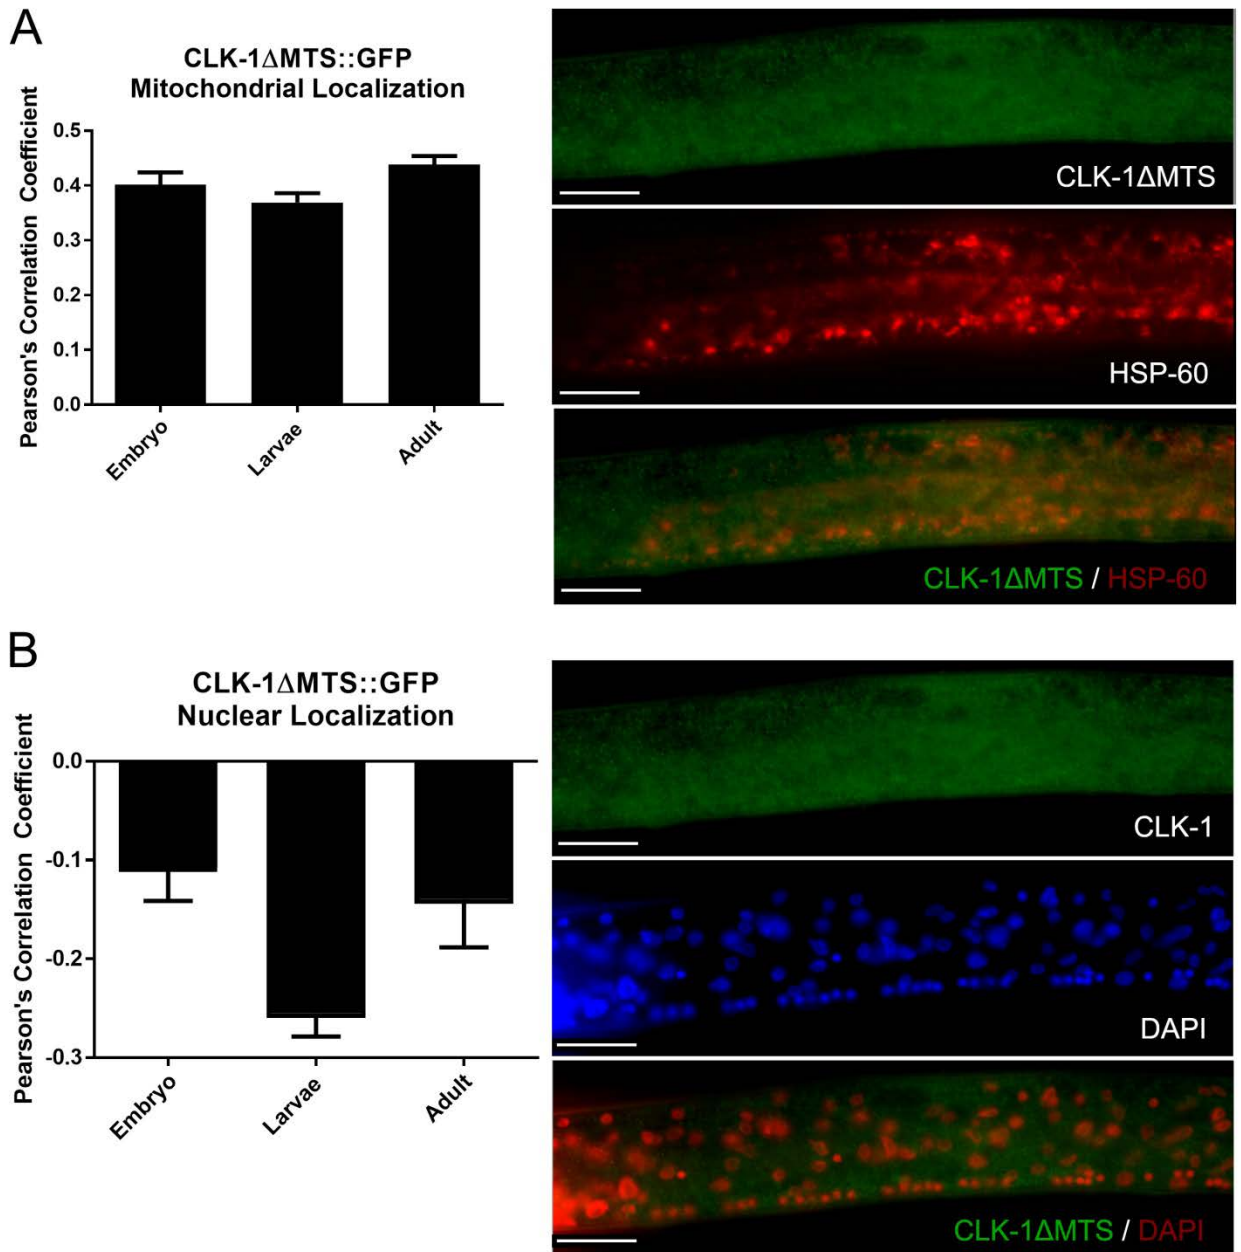

**Legend** CLK-1 $\Delta$ MTS::GFP Expression is Diffuse but Predominantly Mitochondrial. Worms of all stages were freeze-cracked, fixed and stained using antibodies against GFP and HSP-60. Worms of all stages showed diffuse GFP signal. A) Left: Quantification of Pearson's Correlation Coefficient between CLK-1 $\Delta$ MTS::GFP and HSP-60. Values shown are Mean + SEM. Right: Double staining of CLK-1 $\Delta$ MTS (FITC filter) and HSP-60 (TxRED filter). B) Left: Quantification of Pearson's Correlation Coefficient between CLK-1 $\Delta$ MTS::GFP and DAPI. Values shown are Mean + SEM. Right: Double staining of CLK-1 $\Delta$ MTS (FITC filter) and DAPI (DAPI filter). Worms shown in this figure were imaged at 400x. Scale bar in all images is 20  $\mu$ m.

**Table S1** Effects of DHB treatment on the growth of wild-type (N2) and *clk-1* mutants fed with UQ-deficient *E. coli*. Synchronized L1 worms were plated on GD1-seeded NGM plates containing different concentrations of DHB (day 0) and left to grow at 20 °C for 4 days. They were monitored daily for growth and development.

| Group                            | Stages of development |        |                        |                            |
|----------------------------------|-----------------------|--------|------------------------|----------------------------|
|                                  | Day 1                 | Day 2  | Day 3                  | Day 4                      |
| N2                               | L3                    | YA     | A + progeny (eggs, L1) | A + progeny (larvae, YA)   |
| N2 + 10 mM DHB                   | L3                    | YA     | A + progeny (eggs, L1) | A + progeny (larvae, YA)   |
| <i>clk-1(qm30)</i>               | L2                    | L2     | L2                     | L2                         |
| <i>clk-1(qm30)</i> + 0.01 mM DHB | L2, L3                | L2, L3 | YA                     | A                          |
| <i>clk-1(qm30)</i> + 0.05 mM DHB | L2, L3                | L3, L4 | YA, a few A            | A + progeny (eggs)         |
| <i>clk-1(qm30)</i> + 0.15 mM DHB | L2, L3                | L4, YA | A                      | A +progeny (eggs+L1)       |
| <i>clk-1(qm30)</i> + 0.5 mM DHB  | L3                    | L4, YA | A + progeny (eggs)     | A + progeny (eggs, larvae) |
| <i>clk-1(qm30)</i> +1 mM DHB     | L3                    | YA     | A + progeny (eggs)     | A + progeny (larvae, YA)   |
| <i>clk-1(qm30)</i> + 5 mM DHB    | L3                    | YA     | A + progeny (eggs, L1) | A + progeny (larvae, YA)   |

L1, L2, L3 and L4, larval stages; YA, young adult; A, adults with eggs.

Table S2 Individual aging, defecation and pumping rate experiments and statistics

| Genotype                                                | Treatment      | Mean lifespan (days $\pm$ S.D.) | Maximum lifespan (days) | p-values vs. control (log-rank test) | Mean lifespan changes in days |
|---------------------------------------------------------|----------------|---------------------------------|-------------------------|--------------------------------------|-------------------------------|
| Wild Type                                               | Control        | 18.1 $\pm$ 1.8(n=75)            | 24                      |                                      |                               |
|                                                         | 0.15mM 2,4-DHB | 18.1 $\pm$ 2.0(n=75)            | 25                      |                                      |                               |
|                                                         | 1mM 2,4-DHB    | 17.8 $\pm$ 2.0(n=75)            | 23                      |                                      |                               |
| <i>clk-1(qm30)</i>                                      | Control        | 25.0 $\pm$ 3.1(n=75)            | 33                      |                                      |                               |
|                                                         | 0.15mM 2,4-DHB | 18.3 $\pm$ 2.6(n=75)            | 33                      | P<0.0001                             | -6.7                          |
|                                                         | 1mM 2,4-DHB    | 17.8 $\pm$ 2.0(n=75)            | 24                      | P<0.0001                             | -7.2                          |
| <i>clk-1(e2519)</i>                                     | Control        | 21.6 $\pm$ 1.9(n=50)            | 27                      |                                      |                               |
|                                                         | 1mM 2,4-DHB    | 18.2 $\pm$ 2.1(n=50)            | 22                      | P<0.0001                             | -3.4                          |
| Wild Type                                               | Control        | 17.2 $\pm$ 2.3(n=50)            | 25                      |                                      |                               |
|                                                         | 1mM 3,4-DHB    | 16.4 $\pm$ 1.9(n=50)            | 21                      |                                      |                               |
| <i>clk-1(qm30)</i>                                      | Control        | 22.5 $\pm$ 4.1(n=100)           | 35                      |                                      |                               |
|                                                         | 1mM 3,4-DHB    | 21.7 $\pm$ 3.3(n=100)           | 30                      |                                      |                               |
| <i>clk-1(qm30)</i>                                      | Control        | 24.6 $\pm$ 2.4(n=100)           | 31                      |                                      |                               |
| <i>clk-1(qm30); CLK-1(<math>\Delta</math>MTS)::GFP</i>  |                | 24.4 $\pm$ 3.0(n=100)           | 33                      |                                      |                               |
| <i>clk-1(qm30); daf-2(e1370)</i>                        | Control        | 56.3 $\pm$ 15.4(n=50)           | 78                      |                                      |                               |
|                                                         |                | 56.9 $\pm$ 14.3(n=50)           | 80                      |                                      |                               |
| <i>CLK-1(<math>\Delta</math>MTS)::GFP</i>               |                |                                 |                         |                                      |                               |
| <i>clk-1(e2519)</i>                                     | Control        | 21.3 $\pm$ 2.3(n=50)            | 26                      |                                      |                               |
| <i>clk-1(e2519); CLK-1(<math>\Delta</math>MTS)::GFP</i> |                | 21.4 $\pm$ 1.7(n=50)            | 24                      |                                      |                               |
| Wild Type                                               | Control        | 17.2 $\pm$ 2.3(n=50)            | 24                      |                                      |                               |
|                                                         | 1mM 2,4-DHB    | 17.1 $\pm$ 2.0(n=50)            | 24                      |                                      |                               |
| <i>clk-1(qm30); CLK-1(<math>\Delta</math>MTS)::GFP</i>  | Control        | 23.7 $\pm$ 2.8(n=50)            | 30                      |                                      |                               |
|                                                         | 1mM 2,4-DHB    | 16.4 $\pm$ 2.4(n=50)            | 21                      | P<0.0001                             | -7.3                          |

Table S2, continued

| Genotype                                               | Treatment    | Mean defecation cycle length (sec)<br>Mean $\pm$ SEM | Maximum defecation cycle length (sec) | p-values vs. control (t-test) | Mean defecation cycle length change (sec) |
|--------------------------------------------------------|--------------|------------------------------------------------------|---------------------------------------|-------------------------------|-------------------------------------------|
| Wild type                                              | Control      | 55.7 $\pm$ 0.6(n=20)                                 | 60.0                                  |                               |                                           |
|                                                        | 1mM 2,4-DHB  | 55.8 $\pm$ 0.6(n=20)                                 | 60.0                                  |                               |                                           |
|                                                        | 10mM 2,4-DHB | 55.1 $\pm$ 0.5(n=22)                                 | 59.8                                  |                               |                                           |
| <i>clk-1(qm30)</i>                                     | Control      | 96.9 $\pm$ 2.1(n=20)                                 | 109.0                                 |                               |                                           |
|                                                        | 1mM 2,4-DHB  | 57.5 $\pm$ 0.5(n=22)                                 | 60.4                                  | P<0.0001                      | -39.4                                     |
|                                                        | 10mM 2,4-DHB | 55.7 $\pm$ 0.7(n=21)                                 | 59.6                                  | P<0.0001                      | -41.2                                     |
| Wild type                                              | Control      | 53.0 $\pm$ 0.4(n=20)                                 | 56.0                                  |                               |                                           |
| <i>clk-1(qm30)</i>                                     |              | 89.6 $\pm$ 3.2(n=22)                                 | 122.0                                 | P<0.0001                      | +36.6                                     |
| <i>clk-1(qm30); CLK-1::GFP</i>                         |              | 53.3 $\pm$ 0.5(n=22)                                 | 57.0                                  |                               |                                           |
| <i>clk-1(qm30); CLK-1(<math>\Delta</math>MTS)::GFP</i> |              | 94.5 $\pm$ 3.4(n=21)                                 | 125.3                                 | P<0.0001                      | +41.5                                     |

| Genotype                                               | Treatment    | Mean number of pumps per minute<br>Mean $\pm$ SEM | Maximum number of pumps per minute | p-values vs. control (t-test) | Mean number of pumps change |
|--------------------------------------------------------|--------------|---------------------------------------------------|------------------------------------|-------------------------------|-----------------------------|
| Wild type                                              | Control      | 292.7 $\pm$ 5.2(n=22)                             | 336                                |                               |                             |
|                                                        | 1mM 2,4-DHB  | 297.2 $\pm$ 4.9(n=20)                             | 342                                |                               |                             |
|                                                        | 10mM 2,4-DHB | 291.5 $\pm$ 4.3(n=22)                             | 336                                |                               |                             |
| <i>clk-1(qm30)</i>                                     | Control      | 180.6 $\pm$ 3.7(n=22)                             | 212                                |                               |                             |
|                                                        | 1mM 2,4-DHB  | 297.6 $\pm$ 5.5(n=21)                             | 336                                | P<0.0001                      | +117.0                      |
|                                                        | 10mM 2,4-DHB | 296.5 $\pm$ 6.2(n=21)                             | 356                                | P<0.0001                      | +115.9                      |
| Wild type                                              | Control      | 297.0 $\pm$ 5.2(n=22)                             | 358                                |                               |                             |
| <i>clk-1(qm30)</i>                                     |              | 182.7 $\pm$ 3.5(n=22)                             | 218                                | P<0.0001                      | -114.3                      |
| <i>clk-1(qm30); CLK-1::GFP</i>                         |              | 302.5 $\pm$ 4.7(n=22)                             | 338                                |                               |                             |
| <i>clk-1(qm30); CLK-1(<math>\Delta</math>MTS)::GFP</i> |              | 183.8 $\pm$ 3.6(n=22)                             | 210                                | P<0.0001                      | -113.2                      |



Table S3 Real-time PCR primers

| <b>Gene</b>              | <b>Forward primer sequences</b> | <b>Reverse primer sequences</b> | <b>Size(bp)</b> |
|--------------------------|---------------------------------|---------------------------------|-----------------|
| <i>pmp-3</i> (Control)*  | GTTCCCGTGTTTCATCACTCAT          | ACACCGTCGAGAAGCTGTAGA           | 116             |
| <i>hsp-60</i>            | GTCTTGAGCCATCGTCGATTATTG        | CTGTGCGAACCACCTTAGTTGG          | 136             |
| <i>cdc-42</i> (Control)* | CTGCTGGACAGGAAGATTACG           | CTCGGACATTCTCGAATGAAG           | 112             |
| <i>hsp-6</i>             | GGAACAACAGATCGTTATCCAATC        | GTGTCGTGGATGATTCCTTCAG          | 153             |
| <i>spg-7</i>             | CAATTCCCAGGAGGATGGC             | CTTCAAGTCTCTCGACAAGTCCAG        | 151             |

\*The reference gene for each target gene was assessed by a validation experiment to test whether they share equal amplification efficiency.
